1           **Combining Multi-Dimensional Molecular Fingerprints to Predict hERG**

2                                   **Cardiotoxicity of Compounds**

3       Weizhe Ding<sup>1#</sup>, Li Zhang<sup>1,2,3\*#</sup>, Yang Nan<sup>1</sup>, Juanshu Wu<sup>1</sup>, Xiangxin Xin<sup>1</sup>, Chenyang

4                                   Han<sup>1</sup>, Siyuan Li<sup>1</sup>, Hongsheng Liu<sup>2,3,4\*</sup>

5       <sup>1</sup>School of Life Sciences, Liaoning University, Shenyang 110036, China

6       <sup>2</sup>Technology Innovation Center for Computer Simulating and Information Processing  
7       of Bio-macromolecules of Liaoning Province, Shenyang 110036, China

8       <sup>3</sup>Engineering Laboratory for Molecular Simulation and Designing of Drug Molecules  
9       of Liaoning, Liaoning University, Shenyang, 110036, China

10      <sup>4</sup>School of Pharmaceutical Sciences, Liaoning University, Shenyang 110036, China

11      \*Corresponding author

12      Hongsheng Liu

13      School of Pharmaceutical Sciences, Liaoning University

14      Address: No. 66, Chongshan Zhonglu, Shenyang, Liaoning, 110036, China

15      [liuhongsheng@lnu.edu.cn](mailto:liuhongsheng@lnu.edu.cn)

16      Li Zhang

17      School of Life Sciences, Liaoning University

18      Address: No. 66, Chongshan Zhonglu, Shenyang, Liaoning, 110036, China

19      lizhang@lnu.edu.cn

20      <sup>#</sup>These co-first authors contributed equally to this work.

21 **Abstract**

22 At present, drug toxicity has become a critical problem with heavy medical and  
23 economic burdens. acLQTS (acquired Long QT Syndrome) is acquired cardiac ion  
24 channel disease caused by drugs blocking the hERG channel. Therefore, it is  
25 necessary to avoid cardiotoxicity in the drug design and computer models have been  
26 widely used to fix this plight. In this study, we present a molecular fingerprint based  
27 on the molecular dynamic simulation and uses it combined with other molecular  
28 fingerprints (multi-dimensional molecular fingerprints) to predict hERG  
29 cardiotoxicity of compounds. 203 compounds with hERG inhibitory activity (pIC50)  
30 were retrieved from a previous study and predicting models were established using  
31 four machine learning algorithms based on the single and multi-dimensional  
32 molecular fingerprints. Results showed that MDFP has the potential to be an  
33 alternative to traditional molecular fingerprints and the combination of MDFP and  
34 traditional molecular fingerprints can achieve higher prediction accuracy. Meanwhile,  
35 the accuracy of the best model, which was generated by consensus of four algorithms  
36 with multi-dimensional molecular fingerprints, was 0.694 (RMSE) in the test dataset.  
37 Besides, the number of hydrogen bonds from MDFP has been determined as a critical  
38 factor in the predicting models, followed by rgyr and sasa. Our findings provide a new  
39 sight of MDFP and multi-dimensional molecular fingerprints in building models of  
40 hERG cardiotoxicity prediction.

41 **Keywords:** Molecular dynamic simulation; Molecular fingerprint; Machine learning;  
42 hERG;

## 43 **1. Introduction**

44 Drug-induced toxicity has become a critical reason for the failure of drug  
45 discovery and development in recent years (Wallace, 2015). A previous study showed  
46 that there were more than half of drugs failed (54%) in clinical development among  
47 640 novel therapeutics, while 17% of them failed because of drug-induced toxicity  
48 (Hwang et al., 2016). Besides, it has also been reported that the mean costs required to  
49 bring a new drug to market increased from \$374.1 million to \$1335.9 million after  
50 counting for costs of failed trials (Wouters et al., 2016). Thus, it has become an urgent  
51 task to find ways to identify the toxicity of compounds on a large scale in drug  
52 development.

53 Acquired Long QT syndrome (acLQTS), one of the most important diseases  
54 caused by drug-induced toxicity, is a potentially life-threatening cardiac arrhythmia  
55 disease that increases the risk for syncope, sudden cardiac death (SCD), and seizures  
56 (Tester & Ackerman, 2014). The hERG protein is a tetrameric potassium ion channel  
57 and mainly relates to cardiotoxicity and acLQTS (Liu et al., 2020). It has been  
58 reported that the potassium ion channel (hERG channel) may be blocked caused by  
59 antiarrhythmic drug binding, which leads to prolonged repolarization time and  
60 acLQTS (Witchel, 2007). At present, multiple drug candidates have failed due to the  
61 cardiotoxicity of hERG, such as cisapride, terfenadine, sertindole, pimozone, and  
62 astemizole, which have become a significant limiting factor in drug discovery and  
63 development (Bergström & Lindmark, 2019; Villoutreix & Taboureau, 2019).

64 Computer-aided drug design (CADD) has been thought of as an alternate choice

65 to reduce the amount of time and money in the development of drug design,  
66 especially in predicting drug toxicity (Maia et al., 2020). Molecular fingerprints are a  
67 way of CADD and are used to encoding the structure of molecules (O'Boyle et al.,  
68 2011). It has been deployed as descriptors for predicting biological activities and  
69 compound properties (Muegge & Mukherjee, 2014). Frequently used molecular  
70 fingerprints are structure-based and property-based (Kelley, 2018; Rogers & Hahn,  
71 2010; Riniker & Landrum, 2013; Riniker, 2017). A previous study of hERG  
72 cardiotoxicity prediction showed that the accuracy of the best model developed by  
73 molecular descriptors reached 0.54 ( $R^2$ ), while RMSE was 0.63 (Johnson et al., 2007).  
74 Another study of the hERG channel also showed that the accuracy of the regression  
75 model by descriptors was 0.60 ( $Q^2$ ) and 0.55 (RMSE) for pIC50 (Radchenko et al.,  
76 2017). These results showed the practicalities and effectiveness based on commonly  
77 used molecular fingerprints. However, there are still no fingerprints that considered  
78 the time factor applied on the cardiotoxicity prediction of hERG.

79 Molecular dynamics fingerprints (MDFP) are the fingerprints based on  
80 calculating the trajectory of molecular dynamic simulation and have rapidly become a  
81 hotspot. After adding the dimension of time, MDFP can be seen as a choice of the  
82 traditional molecular fingerprint. The study of p-glycoprotein substrates prediction  
83 showed that gradient tree boosting (GTB) methods in combination with MDFP was  
84 the only model which achieved a good accuracy on the in-house dataset (Esposito et  
85 al., 2020). Meanwhile, the research of free-energy prediction showed good  
86 performance with a heterogeneous fusion model by MDFP (Riniker, 2017). Besides,

87 studies of self-solvation free energies and application of MDFP in SAMPL6  
88 octanol–water log P blind challenge also revealed a high prediction rate (Gebhardt et  
89 al., 2020; Wang & Riniker, 2019). As a consequence, MDFP can be an alternative  
90 choice of traditional molecular fingerprints and has great application potential on the  
91 cardiotoxicity prediction of hERG.

92 Multi-dimensional molecular fingerprints are indicated as multiple molecular  
93 fingerprints combining together in order to predict more accurately. Previous studies  
94 showed that multi-dimensional molecular fingerprints were better than the single  
95 molecular fingerprint in drug development (Kyaw et al., 2020). Thus, in this study, we  
96 studied MDFP and multi-dimensional molecular fingerprints (MDFP with other  
97 molecular fingerprints) in predicting hERG cardiotoxicity of compounds. The  
98 extensive open dataset of hERG compounds with IC50 values has been collected from  
99 previous studies. Then, molecular dynamic simulation was conducted to generate  
100 MDFP and traditional molecular fingerprints have also been generated by Baseline2D,  
101 ECFP4, and PropertyFP. Finally, the regression models were built by machine  
102 learning with four algorithms. Our study provides new sights on the combination of  
103 multi-dimensional molecular fingerprints and the research of predicting the hERG  
104 cardiotoxicity of compounds.

## 105 **2. Methods**

### 106 **2.1. Toxicity Datasets**

107 A high-quality hERG inhibitor dataset has been collected from the previous  
108 study (Munawar et al., 2019). The IC50 value is the biochemical half-maximal

109 inhibitory concentration and has been used to represent the inhibiting abilities of  
110 compounds on hERG in this dataset (Kalliokoski et al., 2013). The data of toxicity  
111 have been eliminated if the name and IC50 values were repeated. The repeated  
112 molecules have also been averaged if the difference IC50 values were less than one  
113 order of magnitude (Feng et al., 2021). Finally, 203 compounds have been collected  
114 with specific IC50 values of the hERG. The distribution of training and testing sets  
115 followed by 80% and 20%, respectively. The training sets were used for 5-fold  
116 cross-validation and the testing sets were used to check the prediction performance of  
117 the established model for new compounds. Besides, pIC50 is the negative log unit of  
118 the IC50 values and has been used to represent inhibiting abilities better than IC50  
119 (Cortés-Ciriano et al., 2020). Therefore, IC50 of compounds was converted to pIC50.

## 120 **2.2. MD Simulations**

121 Molecular dynamics (MD) simulation was performed by GROMACS (2020.4).  
122 For compounds in the dataset, mol2 files were obtained from Zinc15  
123 (<http://zinc15.docking.org/>) by using SMILES files. The topology of compounds was  
124 generated with AMBER14SB force field by ACPYPE (<https://www.bio2byte.be/>)  
125 (Sousa da Silva et al., 2012). Afterward, the compounds were placed in a  
126 dodecahedron box with a size of 1.0 nm centrally and solvated with the TIP3P water  
127 model. Then, the descent energy minimization with 100ps was applied to the system.  
128 An additional equilibration of 1ns under NVT and NPT conditions was carried out,  
129 while the constant temperature was 300 K and the constant pressure was 1 bar,  
130 respectively (Sun et al., 2020). Finally, the system was performed with running 5 ns

131 MD simulation and coordinates were written every 10ps, energies every 1ps.

### 132 **2.3. 2D Molecular Fingerprints**

133 Three types of molecular fingerprints have been used in this study. Baseline2D  
134 was obtained using RDKit and its elements mainly consisted of 10 counts: number of  
135 heavy atoms, number of rotatable bonds, number of N, O, F, P, S, Cl, Br, and I atoms  
136 (Riniker, 2017; Wang & Riniker, 2019). The PropertyFP fingerprint was also obtained  
137 using the Descriptastorus package from RDKit (Kelley, 2018). It contained nearly 200  
138 atoms features and properties. Besides, ECFP4 was generated using the RDKit  
139 implementation of the Morgan algorithm with a vector length of 2048 and a radius of  
140 2 (Rogers & Hahn, 2010).

### 141 **2.4. MD Fingerprints**

142 The MD trajectories were analyzed by the GROMACS toolkit (Ogunwa, 2019).  
143 Following features has been generated: radius of gyration (rgyr), solvent-accessible  
144 surface area (sasa), root mean squared error (rmsd), total energy (tenergy), hydrogen  
145 bonds (hbond), kinetic energy (kinetic), Lennard-Jones short-range energies (LJ-SR)  
146 and Lennard-Jones 1-4 energies (LJ-14). The average (avr), median (mid), and  
147 standard deviation (std) of features were calculated using the R version 3.6.1 (Team,  
148 2013). [Fig. 1](#) showed the MDFP with all properties.

### 149 **2.5. Feature Selection**

150 Feature selection is critically important for predictive models, especially in  
151 machine learning (Johnson et al., 2018). It provides an effective way to reduce the  
152 dimensionality of data sets, identify informative features, and remove irrelevant

153 features, improving the learning accuracy of machine learning models (Holder et al.,  
154 2017). In this study, zero variation and near-zero variation features were deleted  
155 firstly using the nearZeroVar function in the R package caret (version 6.0–84) (Kuhn,  
156 2008). Then, recursive feature elimination (RFE) was performed to select the optimal  
157 feature subset using the rfe function in the caret package in a 10 times 5-fold  
158 cross-validation setting (Darst et al., 2018). In the RFE process, all features are first  
159 ranked according to the feature importance values obtained by the random forest (RF)  
160 algorithm, and then RF models are trained iteratively on the features that are gradually  
161 reduced according to the ranking to evaluate the performance of the feature subsets  
162 (Tang et al., 2020).

## 163 **2.6. Model Construction**

164 In this study, RF, SVM, gradient boosting machine (GBM), and partial least  
165 square regression (PLS) was used for machine learning model construction. All  
166 models were executed beyond R (version 3.6.1) with using the randomForest (version  
167 4.6–12) (Liaw & Wiener, 2002), the kernlab (version 0.9-25) (Karatzoglou et al.,  
168 2004), the gbm (version 2.1.5) (Brandon et al., 2019), and the pls (version 2.7-1)  
169 packages (Bjørn-Helge et al., 2019), respectively.

### 170 *2.6.1 Random forest*

171 RF is the machine learning ensemble classifier and has been applied in many  
172 fields (Breiman, 2001). By constructing multiple decision trees, the RF classifier has  
173 been considered as better performance than the single decision tree (Gandhi et al.,  
174 2018). In the current study, the randomforest function has been used to build RF



175 classifiers. The number of classification trees and variables randomly selected for  
176 each node split have been set as  $n_{tree} = 500$ , while  $m_{try}$  was optimized from one-third  
177 of the number of features minus 10 to plus 15. The relative importance of molecular  
178 fingerprints has also been calculated by the `importance` function of the package.

### 179 *2.6.2 Support vector machine*

180 SVM is a generalized linear classifier based on the principle of structural risk  
181 reduction for pattern recognition (Huang et al., 2018). It is well known as a supervised  
182 learning algorithm that analyzes data and recognizes patterns (Nedaie et al., 2018). In  
183 this study, the radial basis function (RBF) kernel was used for building the SVM  
184 classifier. Meanwhile, the random search method (Bergstra & Bengio, 2012) was also  
185 applied to optimize specific SVM parameters with the regularization parameter  $C$  and  
186  $\sigma$  parameter by using the `caret` package, while  $C$  was from  $e^{-2}$  to  $e^6$ ,  $\sigma$  was from  $e^{-7}$   
187 to  $e$  with the step of  $e^{0.5}$ .

### 188 *2.6.3 Gradient boosting machine*

189 GBM is also a tree-based machine learning model. It has been considered as a  
190 step-wise, additive type model which sequentially fits new-tree-based models (Golden  
191 et al., 2019). Meanwhile, it also has many advantages, especially worked well in  
192 practice (Cho et al., 2019). In this study, the total number of trees (`n.trees`) and the  
193 maximum depth of each tree (`interaction.depth`) have been optimized by using the  
194 `caret` package and have been set from 1 to 3000 and 1 to 10, respectively. Besides,  
195 `shrinkage` and `n.minobsinnode` were set as 0.005 and 10.

### 196 *2.6.4 Partial least square regression*

197 PLS calculates a group of latent variables in connection with the output  
198 maximally and determines the relationship between the input and output data (Foodeh  
199 et al., 2020). It is a stretch of the multiple linear regression models and is widely used  
200 in many domains (Wu et al., 2020). Unlike multiple linear regression (MLR), it can  
201 handle the data with noisy, strongly collinear, and X-variables (Dong et al., 2018). In  
202 this study, n\_components for PLS were optimized from 1 to the greatest features or  
203 sample sizes.

## 204 **2.7. Model Evaluation**

205 In order to test the predictive performance of the models, 5-fold cross-validation  
206 with 10 repeats has been used to evaluate the models. After randomly divided the  
207 original dataset into five equal subsets, four of them were used for training and the  
208 other was used for testing. Then the 5-fold cross-validation was repeated ten times to  
209 reduce the randomness. This cross-validation progress was performed 10 times with  
210 different random seeds of 2, 4, 8, 16, 32, 64, 128, 256, 512, and 1024. Then, average  
211 values were calculated to evaluate the prediction performance of the models.

212 Root-mean-squared error (RMSE), mean unsigned error (MUE), and  $R^2$  has been  
213 used to evaluate the predictive performance of the models. These indicators were  
214 calculated by the following formulas:

$$RMSE = \sqrt{\frac{1}{n} \sum_{i=1}^n (P - E)^2}$$
$$MUE = \frac{1}{n} \sum_{i=1}^n |P - E|$$

$$R^2 = 1 - \frac{\sum_i (P - E)^2}{\sum_i (\bar{E} - E)^2}$$

215 Where  $P$ ,  $\bar{E}$ ,  $E$ ,  $n$  represent predictive value, the average of experimental value,  
216 experimental value, and compound numbers, respectively.

### 217 **3. Results and discussion**

#### 218 **3.1. Feature selection**

219 In this study, 203 compounds were collected from the previous study and divided  
220 into training and testing datasets with 80% to 20%, respectively. In order to build  
221 models to predict hERG cardiotoxicity, MDFP, Baseline2D, ECFP4, and PropertyFP  
222 have been calculated for the compounds in the dataset. [Table 1](#) illustrated the number  
223 of features calculated from each type of molecular fingerprint and the detailed  
224 description of these features is shown in the supplementary files ([Table S1](#) and [Table](#)  
225 [S2](#)). After the feature selection by RF-RFE, 11 and 6 features have been selected from  
226 MDFP and Baseline2D, respectively. Meanwhile, there were also 99 features selected  
227 from ECFP4 and 71 from PropertyFP. Percentage increase in MSE (%IncMSE)  
228 obtained by RF was used to evaluate the importance of features. [Fig. 2](#) showed the top  
229 ten features (Baseline2D for six) which important to the prediction models. The  
230 results of MDFP showed that the number of hydrogen bonds between compounds and  
231 water has a significant effect on predicting hERG cardiotoxicity, followed by kinetic  
232 energy and surface area. Besides, the results of 2D molecular fingerprints indicated  
233 that the number of heavy atoms, number of O atoms (oxygenes), and number of F  
234 atoms (fluorines) were the most important features in Baseline2D, while MolLog P in  
235 PropertyFP and 3218693969 in ECFP4. Above all, after calculating features in all

236 molecular fingerprints, the following features have been selected as the most critical  
237 with heavyatoms, oxygens, fluorines, the median of hydrogen bonds, and 3218693969.  
238 These features may be played important roles in predicting the hERG cardiotoxicity  
239 and should be paid extra attention in the development of drug candidates.

### 240 **3.2. Prediction performance of the models**

241 After performing feature selection, the GBM, PLS, RF, and SVM algorithms  
242 were used for generating ML models based on the resulting fingerprints. The  
243 performance of these machine learning models was evaluated by 10 times 5-fold  
244 cross-validation and their performances were presented in [Table 2](#). The results showed  
245 that the RMSE of each machine learning model based on PropertyFP is the lowest,  
246 with a range of 0.860-0.960, followed by MDFP, with a range of 0.967-1.039, while  
247 ECFP4 and Baseline2D are poor quality.  $R^2$  and MUE also showed the same pattern.  
248 [Table 3](#) illustrated the performance of these models which were used to predict the  
249 pIC50 of the molecules in the testing set. In general, the models show better RMSE  
250 values in the test set than in the 5-fold cross-validation, indicating that the model has  
251 not been overfitted. Meanwhile, compared with the models based on different  
252 molecular fingerprints, the performance in the testing set was similar, while  
253 Baseline2D was slightly better (RMSE=0.721 to 0.795) and MDFP also obtained a  
254 good performance (RMSE=0.755 to 0.819). These results indicated that MDFP can  
255 effectively predict the activity of hERG inhibitors, and the predictive performance of  
256 the MDFP was similar to the traditional molecular fingerprints.

257 The predictive performance of the MDFP model combined with other molecular

258 fingerprints was also investigated in this study. [Table 4](#) and [Table 5](#) showed the  
259 performance of models in the 5-fold cross-validation sets and testing sets while  
260 MDFP combined with other molecular fingerprints, respectively. The results showed  
261 that the combination of MDFP and other molecular fingerprints can obtain a model  
262 with better prediction performance. For example, the model established by the single  
263 molecular fingerprint (MDFP or PropertyFP) in the 5-fold cross-validation had the  
264 best performance as PropertyFP-SVM (RMSE=0.860). However, the model  
265 established by multi-dimensional molecular fingerprints (MDFP and PropertyFP) was  
266 MDFP+PropertyFP-SVM (RMSE=0.837), which showed a better performance than  
267 using the single molecular fingerprints. Besides, models combining MDFP with other  
268 molecular fingerprints also showed better predictive performance in the testing set  
269 ([Table 5](#)), while the best model was the SVM model trained on MDFP++ (MDFP with  
270 all other fingerprints) (RMSE=0.696±0.015). These results illustrated that the  
271 performance of multi-dimensional molecular fingerprints was better than the single  
272 molecular fingerprints and MDFP may provide additional effective predictors for the  
273 prediction of hERG inhibitor activity.

274 In order to improve the prediction performance of the model, we further  
275 averaged the prediction results of the four machine learning models to obtain a  
276 consensus value. The prediction performance was shown in [Table 3](#) and [Table 5](#). [Fig.](#)  
277 [3](#) and [Fig. 4](#) showed the predicted values vs experimental values for MDFP and  
278 MDFP++, respectively. The values of other molecular fingerprints have been  
279 demonstrated in the supplementary files ([Fig. S1 to S6](#)). It was found that the

280 performance of consensus models was significantly better than the other models  
281 (except PropertyFP). Among the models established by a single molecular fingerprint,  
282 the consensus model based on Baseline2D had the highest accuracy (RMSE=0.713),  
283 while the consensus model based on MDFP also obtained a better RMSE of  
284 0.745. Meanwhile, in the model based on the multi-dimensional molecular  
285 fingerprints, MDFP+ECFP4 and MDFP++ obtained high accuracy with RMSE of  
286 0.694 and 0.695, respectively. These results indicated that the integrated model can  
287 obtain a better method for predicting the activity of hERG inhibitors.

288       In summary, these results illustrated that the MDFP was effective compared with  
289 traditional molecular fingerprints and can truly be an alternative to the other  
290 molecular fingerprints. Meanwhile, the prediction accuracies of all ML models on  
291 multi-dimensional molecular fingerprints were better than the single molecular  
292 fingerprints in predicting the hERG cardiotoxicity. Besides, the integrated models  
293 showed the best prediction than the single models among most of the molecular  
294 fingerprints. Thus, the models obtained by multiple machine learning methods could  
295 be more accurate in predicting the hERG cardiotoxicity of compounds.

### 296 **3.3. MDFP features associated with cardiotoxicity**

297       To further reveal the contributions of fingerprint features associated with  
298 cardiotoxicity, the correlation coefficient has been used to determine the feature  
299 between MDFP and pIC50. Correlation is a measure of a monotonic association  
300 between 2 variables and Pearson's correlation coefficient has become one of the most  
301 frequently used statistics (Armstrong, 2019). In this study, Pearson, Kendall, and

302 Spearman correlations were used to evaluate the important features of MDFP with  
303 pIC50. [Table 6](#) showed the correlation coefficient between the feature of MDFP and  
304 pIC50. The median of rgyr has been determined as the most relevant feature with  
305 pIC50 (Kendall = 0.35, Pearson = 0.51, and Spearman = 0.49), followed by the  
306 median of sasa and kinetic with the high correlation coefficient. These results showed  
307 the features which extracted from MDFP had strong correlations with pIC50 and can  
308 be used to predict cardiotoxicity in the future study.

### 309 **3.4. Compared with other models**

310 Recently, a couple of computational models have been developed for toxicity  
311 prediction. Among them, cardiotoxicity prediction has become a hotspot with multiple  
312 studies. [Table 7](#) showed the comparisons between our model and other models for  
313 cardiotoxicity prediction. Compared with other models, the consensus model with  
314 MDFP and ECFP4 showed the lowest RMSE and MUE, with higher  $R^2$ . Meanwhile,  
315 the molecular fingerprints of previous studies were used by only one dimension,  
316 which may prove that multi-dimensional fingerprints performed well in predicting the  
317 cardiotoxicity of hERG. Besides, although it was lower than QSAR-SVM, the  
318 consensus with MDFP still better than the other models as  $0.745 \pm 0.005$  (RMSE),  
319 which illustrated the advantages of MDFP. These findings showed that MDFP and  
320 multi-dimensional molecular fingerprints with machine learning methods can be an  
321 outstanding model in predicting cardiotoxicity.

## 322 **4. Conclusion**

323 In this study, MDFP and multi-dimensional molecular fingerprints were used for

324 building machine learning models to predict the hERG cardiotoxicity of compounds.  
325 203 compounds were firstly identified to establish the 5-fold cross-validation and  
326 testing datasets. Then molecular dynamic simulation has been used to generate  
327 molecular dynamic molecular fingerprints. Baseline2D, ECFP4, and PropertyFP were  
328 used to generate traditional molecular fingerprints. After that, critical features have  
329 been selected by RF-RFE and 4 machine learning algorithms, namely RF, SVM,  
330 GBM, and PLS were used for building predicting models based on the single  
331 fingerprints and multi-dimensional molecular fingerprints. Besides, the correlation  
332 between MDFP and pIC50 has also been surveyed. Results showed that MDFP has  
333 the potential to be an alternative choice of molecular fingerprints and  
334 multi-dimensional molecular fingerprints are better than single fingerprints in  
335 predicting cardiotoxicity. It also illustrated that the consensus model with MDFP and  
336 ECFP4 has the optimum prediction effect and hydrogen bonds are critically important  
337 in the models with MDFP. Our finding provides a new sight into the application of  
338 MDFP and multi-dimensional molecular fingerprints in predicting the hERG  
339 cardiotoxicity of compounds. Cell and animal experiments will be carried out to  
340 validate further.

#### 341 **Conflict of interests**

342 The authors declare that they have no conflict of interests.

#### 343 **Acknowledgements**

344 This study was supported by the National Natural Science Foundation of China (No.  
345 82003655), the Key R&D Program of Liaoning Province (No. 2019JH2/10300041),



346 Scientific Research Project from Department of Education of Liaoning Province (No.  
347 LQN201906), Shenyang Science and Technology Plan Project (No. 17-65-7-00,  
348 19-302-3-04).

#### 349 **Data Availability Statement**

350 All data and models generated or used during the study appear in the submitted  
351 article.

#### 352 **Author contributions**

353 WZD, LZ, and HSL conceived the project, developed the prediction method, designed,  
354 and implemented the experiments, analyzed the result, and wrote the paper. YN, JSW,  
355 and XXX implemented the experiments, analyzed the result, and wrote the paper.  
356 SYH and SYL analyzed the result. All authors read and approved the final manuscript.

#### 357 **References**

- 358 Armstrong RA., 2019. Should Pearson's correlation coefficient be avoided? *Ophthalmic Physiol*  
359 *Opt.* 39, 316-327. <https://doi.org/10.1111/opo.12636>
- 360 Bergstra J., Bengio Y., 2012. Random search for hyper-parameter optimization. *J. Mach. Learn.*  
361 *Res.* 13, 281–305.
- 362 Bergström F., Lindmark B., 2019. Accelerated drug discovery by rapid candidate drug  
363 identification. *Drug Discov Today.* 24, 1237-1241.  
364 <https://doi.org/10.1016/j.drudis.2019.03.026>.
- 365 Bjørn-Helge M., Ron W., and Kristian L., 2019. Partial Least Squares (PLS) and Principal  
366 Component Regression. R package v2.7.1 (version 2.7.1).  
367 <https://CRAN.R-project.org/package=pls>

- 368 Brandon G., Bradley B., Jay C., and GBM Developers., 2019. Generalized Boosted Regression  
369 Models (GBM). R package v2.1.5 (version 2.1.5). <https://CRAN.R-project.org/package=gbm>
- 370 Breiman L., 2001. Random Forests. *Mach. Learn.* 45, 5–32.  
371 <https://doi.org/10.1023/A:1010933404324>.
- 372 Cho G., Yim J., Choi Y., Ko J., Lee SH., 2019. Review of Machine Learning Algorithms for  
373 Diagnosing Mental Illness. *Psychiatry Investig.* 16, 262-269.  
374 <https://doi.org/10.30773/pi.2018.12.21.2>.
- 375 Cortés-Ciriano I., Škuta C., Bender A., Svozil D., 2020. QSAR-derived affinity fingerprints (part  
376 2): modeling performance for potency prediction. 12, 41.  
377 <https://doi.org/10.1186/s13321-020-00444-5>.
- 378 Darst BF., Malecki KC., Engelman CD., 2018. Using recursive feature elimination in random  
379 forest to account for correlated variables in high dimensional data. *BMC Genet.* 19, 65.  
380 <https://doi.org/10.1186/s12863-018-0633-8>.
- 381 Dong J., Wang NN., Yao ZJ., Zhang L., Cheng Y., Ouyang D., Lu AP., Cao DS., 2018.  
382 ADMETlab: a platform for systematic ADMET evaluation based on a comprehensively  
383 collected ADMET database. *J Cheminform.* 10, 29.  
384 <https://doi.org/10.1186/s13321-018-0283-x>.
- 385 Esposito C., Wang S., Lange UEW., Oellien F., Riniker S., 2020. Combining Machine Learning  
386 and Molecular Dynamics to Predict P-Glycoprotein Substrates. *J Chem Inf Model.* 60,  
387 4730-4749. <https://doi.org/10.1021/acs.jcim.0c00525>.
- 388 Feng H., Zhang L., Li S., Liu L., Yang T., Yang P., Zhao J., Arkin IT., Liu H., 2021. Predicting  
389 the reproductive toxicity of chemicals using ensemble learning methods and molecular

- 390 fingerprints. *Toxicol Lett.* 340, 4-14. <https://doi.org/10.1016/j.toxlet.2021.01.002>.
- 391 Foodeh R., Ebadollahi S., Daliri MR., 2020. Regularized Partial Least Square Regression for  
392 Continuous Decoding in Brain-Computer Interfaces. *Neuroinformatics.* 18, 465-477.  
393 <https://doi.org/10.1007/s12021-020-09455-x>.
- 394 Gandhi K., Schmidt B., Ng A.H., 2018. Towards data mining based decision support in  
395 manufacturing maintenance. *Procedia CIRP.* 72, 261-265.  
396 <http://doi.org/10.1016/j.procir.2018.03.076>.
- 397 Gebhardt J., Kiesel M., Riniker S., Hansen N., 2020. Combining Molecular Dynamics and  
398 Machine Learning to Predict Self-Solvation Free Energies and Limiting Activity Coefficients.  
399 *J Chem Inf Model.* 60, 5319-5330. <http://doi.org/10.1021/acs.jcim.0c00479>.
- 400 Golden CE., Rothrock MJ Jr., Mishra A., 2019. Comparison between random forest and gradient  
401 boosting machine methods for predicting *Listeria* spp. prevalence in the environment of  
402 pastured poultry farms. *Food Res Int.* 122, 47-55.  
403 <http://doi.org/10.1016/j.foodres.2019.03.062>.
- 404 Holder LB., Haque MM., Skinner MK., 2017. Machine learning for epigenetics and future  
405 medical applications. *Epigenetics.* 12, 505-514.  
406 <http://doi.org/10.1080/15592294.2017.1329068>.
- 407 Huang S., Cai N., Pacheco PP., Narrandes S., Wang Y., Xu W., 2018. Applications of Support  
408 Vector Machine (SVM) Learning in Cancer Genomics. *Cancer Genomics Proteomics.* 15,  
409 41-51. <http://doi.org/10.21873/cgp.20063>.
- 410 Hwang TJ., Carpenter D., Lauffenburger JC., Wang B., Franklin JM., Kesselheim AS., 2016.  
411 Failure of Investigational Drugs in Late-Stage Clinical Development and Publication of Trial

412 Results. JAMA Intern Med. 176, 1826-1833.  
413 <http://doi.org/10.1001/jamainternmed.2016.6008>.

414 Johnson SR., Yue H., Conder ML., Shi H., Doweiko AM., Lloyd J., Levesque P., 2007.  
415 Estimation of hERG inhibition of drug candidates using multivariate property and  
416 pharmacophore SAR. Bioorg Med Chem. 15, 6182-6192.  
417 <http://doi.org/10.1016/j.bmc.2007.06.028>.

418 Johnson KW., Torres Soto J., Glicksberg BS., Shameer K., Miotto R., Ali M., Ashley E., Dudley  
419 JT., 2018. Artificial Intelligence in Cardiology. J Am Coll Cardiol. 71, 2668-2679.  
420 <http://doi.org/10.1016/j.jacc.2018.03.521>.

421 Kalliokoski T., Kramer C., Vulpetti A., Gedeck P., 2013. Comparability of mixed IC<sub>50</sub> data - a  
422 statistical analysis. PLoS One. 8, e61007. <http://doi.org/10.1371/journal.pone.0061007>.

423 Karatzoglou A., Smola A., Hornik K., Zeileis A., 2004. Kernel-an S4 package for kernel methods  
424 in R. J. Stat. Softw. 11, 1–20.

425 Kelley B. Descriptor Computation(Chemistry) and (Optional) Storage for Machine Learning.  
426 DescriptaStorus, version 2.2.0. <https://github.com/bp-kelley/descriptastorus>.

427 Kuhn M., 2008. Building predictive models in R using the caret package. J. Stat. Softw. 26, 1–26.

428 Kyaw Zin PP., Borrel A., Fourches D., 2020. Benchmarking 2D/3D/MD-QSAR Models for  
429 Imatinib Derivatives: How Far Can We Predict? J Chem Inf Model. 60, 3342-3360.  
430 <http://doi.org/10.1021/acs.jcim.0c00200>.

431 Liaw A., Wiener M., 2002. Classification and regression by randomForest. R News 2, 18–22.

432 Liu M., Zhang L., Li S., Yang T., Liu L., Zhao J., Liu H., 2020. Prediction of hERG potassium  
433 channel blockage using ensemble learning methods and molecular fingerprints. Toxicol Lett.

- 434 332, 88-96. <http://doi.org/10.1016/j.toxlet.2020.07.003>.
- 435 Maia EHB., Assis LC., de Oliveira TA., da Silva AM., Taranto AG., 2020. Structure-Based  
436 Virtual Screening: From Classical to Artificial Intelligence. *Front Chem.* 8, 343.  
437 <http://doi.org/10.3389/fchem.2020.00343>.
- 438 Muegge I., Mukherjee P., 2016. An overview of molecular fingerprint similarity search in virtual  
439 screening. *Expert Opin Drug Discov.* 11, 137-148.  
440 <http://doi.org/10.1517/17460441.2016.1117070>.
- 441 Munawar S., Vandenberg JJ., Jabeen I., 2019. Molecular Docking Guided Grid-Independent  
442 Descriptor Analysis to Probe the Impact of Water Molecules on Conformational Changes of  
443 hERG Inhibitors in Drug Trapping Phenomenon. *Int J Mol Sci.* 20, 3385.  
444 <http://doi.org/10.3390/ijms20143385>.
- 445 Nedaie A., Najafi AA., 2018. Support vector machine with Dirichlet feature mapping. *Neural*  
446 *Netw.* 98, 87-101. <http://doi.org/10.1016/j.neunet.2017.11.006>.
- 447 O'Boyle NM., Banck M., James CA., Morley C., Vandermeersch T., Hutchison GR., 2011. Open  
448 Babel: An open chemical toolbox. *J Cheminform.* 3, 33.  
449 <http://doi.org/10.1186/1758-2946-3-33>.
- 450 Ogunwa TH., Laudadio E., Galeazzi R., Miyanishi T., 2019. Insights into the Molecular  
451 Mechanisms of Eg5 Inhibition by (+)-Morelloflavone. *Pharmaceuticals (Basel).* 12, 58.  
452 <http://doi.org/10.3390/ph12020058>.
- 453 Radchenko EV., Rulev YA., Safanyaev AY., Palyulin VA., Zefirov NS., 2017. Computer-aided  
454 estimation of the hERG-mediated cardiotoxicity risk of potential drug components. *Dokl*  
455 *Biochem Biophys.* 473, 128-131. <http://doi.org/10.1134/S1607672917020107>.

- 456 Riniker S., Landrum GA., 2013. Open-source platform to benchmark fingerprints for ligand-based  
457 virtual screening. *J Cheminform.* 5, 26. <http://doi.org/10.1186/1758-2946-5-26>.
- 458 Riniker S., 2017. Molecular Dynamics Fingerprints (MDFP): Machine Learning from MD Data  
459 To Predict Free-Energy Differences. *J Chem Inf Model.* 57, 726-741.  
460 <http://doi.org/10.1021/acs.jcim.6b00778>.
- 461 Rogers D., Hahn M., 2010. Extended-connectivity fingerprints. *J Chem Inf Model.* 50, 742-754.  
462 <http://doi.org/10.1021/ci100050t>.
- 463 Sousa da Silva AW., Vranken WF., 2012. ACPYPE - AnteChamber PYthon Parser interface.  
464 *BMC Res Notes.* 5, 367. <http://doi.org/10.1186/1756-0500-5-367>.
- 465 Subramanian G., Ramsundar B., Pande V., Denny RA., 2016. Computational Modeling of  
466  $\beta$ -Secretase 1 (BACE-1) Inhibitors Using Ligand Based Approaches. *J Chem Inf Model.* 56,  
467 1936-1949. <http://doi.org/10.1186/10.1021/acs.jcim.6b00290>.
- 468 Sun CP., Yan JK., Yi J., Zhang XY., Yu ZL., Huo XK., Liang JH., Ning J., Feng L., Wang C.,  
469 Zhang BJ., Tian XG., Zhang L., Ma X., 2019. The study of inhibitory effect of natural  
470 flavonoids toward  $\beta$ -glucuronidase and interaction of flavonoids with  $\beta$ -glucuronidase. *Int J*  
471 *Biol Macromol.* 143, 349-358. <http://doi.org/10.1016/j.ijbiomac.2019.12.057>.
- 472 Tang J., Wang Y., Luo Y., Fu J., Zhang Y., Li Y., Xiao Z., Lou Y., Qiu Y., Zhu F., 2020.  
473 Computational advances of tumor marker selection and sample classification in cancer  
474 proteomics. *Comput Struct Biotechnol J.* 18, 2012-2025.  
475 <http://doi.org/10.1016/j.csbj.2020.07.009>.
- 476 R Core Team., 2013. R: A language and environment for statistical computing. R Foundation for  
477 Statistical Computing. <http://www.R-project.org>

- 478 Tester DJ., Ackerman MJ., 2014. Genetics of long QT syndrome. *Methodist Debaque Cardiovasc*  
479 *J.* 10, 29-33. <http://doi.org/10.14797/mdcj-10-1-29>.
- 480 Villoutreix BO., Taboureau O., 2015. Computational investigations of hERG channel blockers:  
481 New insights and current predictive models. *Adv Drug Deliv Rev.* 86, 72-82.  
482 <http://doi.org/10.1016/j.addr.2015.03.003>.
- 483 Wallace KB., 2015. Multiple Targets for Drug-Induced Mitochondrial Toxicity. *Curr Med Chem.*  
484 22, 2488-2492. <http://doi.org/10.2174/0929867322666150514095424>.
- 485 Wang S., Riniker S., 2020. Use of molecular dynamics fingerprints (MDFPs) in SAMPL6  
486 octanol-water log P blind challenge. *J Comput Aided Mol Des.* 34, 393-403.  
487 <http://doi.org/10.1007/s10822-019-00252-6>.
- 488 Witchel HJ., 2007. The hERG potassium channel as a therapeutic target. *Expert Opin Ther Targets.*  
489 11, 321-336. <http://doi.org/10.1517/14728222.11.3.321>.
- 490 Wouters OJ., McKee M., Luyten J., 2020. Estimated Research and Development Investment  
491 Needed to Bring a New Medicine to Market, 2009-2018. *JAMA.* 323, 844-853.  
492 <http://doi.org/10.1001/jama.2020.1166>.
- 493 Wu ML., Wang YT., Cheng H., Sun FL., Fei J., Sun CC., Yin JP., Zhao H., Wang YS., 2020.  
494 Phytoplankton community, structure and succession delineated by partial least square  
495 regression in Daya Bay, South China Sea. *Ecotoxicology.* 29, 751-761.  
496 <http://doi.org/10.1007/s10646-020-02188-2>.

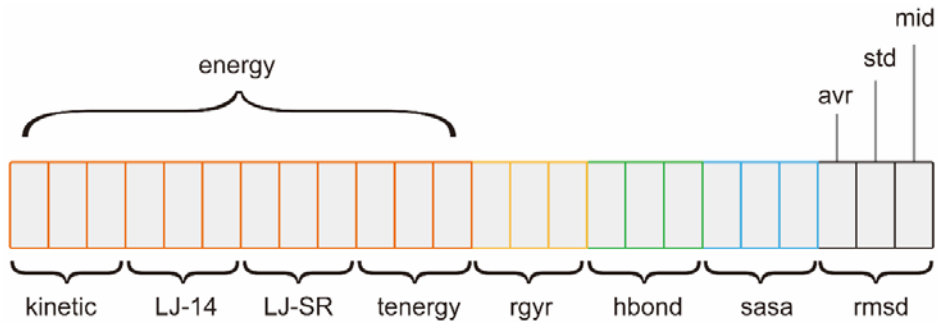

**Fig.1.** Schematic representation of the MDFP variant with all properties: kinetic, LJ-14, LJ-SR, tenergy, rgyr, hbond, sasa, rmsd. Each property is represented by the avr (average), std (standard deviation), and mid (median).



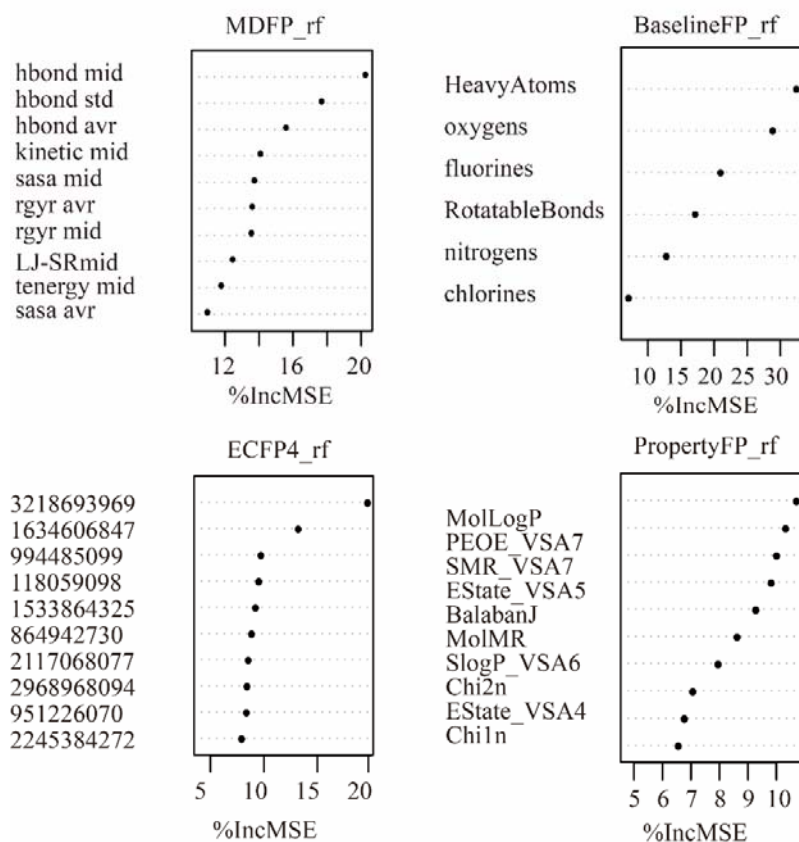

**Fig. 2.** The most important features selected by RF-RFE from MDFP, Baseline2D, ECFP4, and PropertyFP fingerprints.

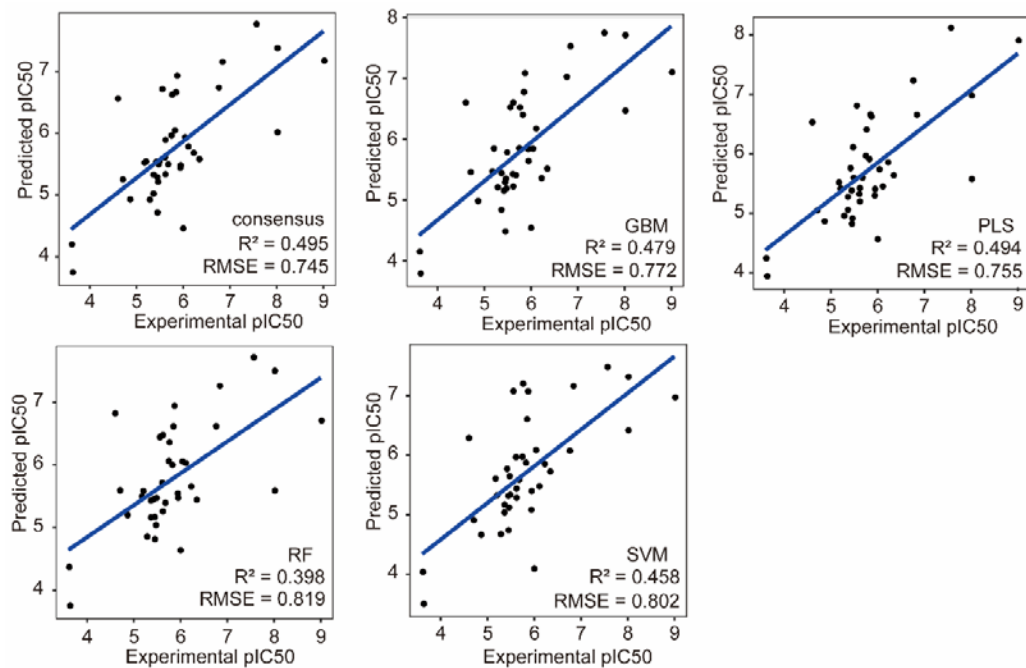

**Fig. 3.** pIC50: The experimental values of the 10<sup>th</sup> operation for the data set. Predictions were generated using consensus, GBM, PLS, RF, SVM trained on MDFP. The linear regression lines are shown in blue.

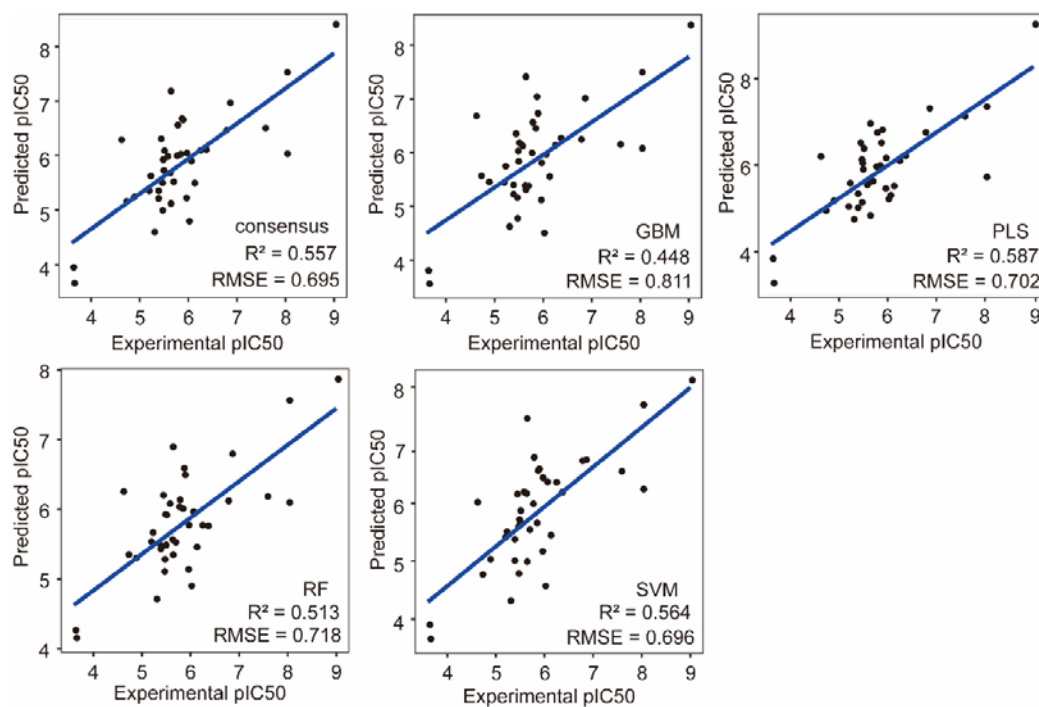

**Fig. 4.** pIC50: The experimental values of the 10<sup>th</sup> operation for the data set. Predictions were generated using consensus, GBM, PLS, RF, SVM trained on MDFP++. The linear regression lines are shown in blue. MDFP++ including MDFP, Baseline2D, ECFP4, and PropertyFP.

**Table 1** The number of features for the different molecular fingerprints.

| fingerprints | number of features | number of selected feature |
|--------------|--------------------|----------------------------|
| MDFP         | 24                 | 11                         |
| Baseline2D   | 10                 | 6                          |
| ECFP4        | 2298               | 99                         |
| PropertyFP   | 200                | 71                         |

**Table 2** Cross-validation performance for models trained using different ML algorithms on the molecular fingerprints (MDFP, Baseline2D, ECFP4, PropertyFP). Performance metrics are represented as average and standard deviation of 10 times 5-fold cross-validation runs of different random seeds.

| fingerprint | ML models | RMSE        | R <sup>2</sup> | MUE         |
|-------------|-----------|-------------|----------------|-------------|
| MDFP        | GBM       | 0.985±0.005 | 0.523±0.004    | 0.774±0.005 |
|             | PLS       | 1.039±0.005 | 0.482±0.006    | 0.797±0.003 |
|             | RF        | 0.977±0.005 | 0.534±0.006    | 0.768±0.004 |
|             | SVM       | 0.967±0.007 | 0.541±0.006    | 0.745±0.007 |
| Baseline2D  | GBM       | 1.112±0.009 | 0.394±0.009    | 0.884±0.006 |
|             | PLS       | 1.189±0.004 | 0.321±0.007    | 0.956±0.003 |
|             | RF        | 1.036±0.011 | 0.465±0.011    | 0.813±0.008 |
|             | SVM       | 1.014±0.006 | 0.492±0.006    | 0.791±0.006 |
| ECFP4       | GBM       | 1.072±0.006 | 0.433±0.007    | 0.837±0.007 |
|             | PLS       | 1.084±0.004 | 0.433±0.004    | 0.850±0.006 |
|             | RF        | 1.043±0.004 | 0.464±0.004    | 0.827±0.004 |
|             | SVM       | 1.009±0.004 | 0.497±0.004    | 0.800±0.004 |
| PropertyFP  | GBM       | 0.941±0.008 | 0.562±0.006    | 0.747±0.007 |
|             | PLS       | 0.959±0.008 | 0.551±0.006    | 0.776±0.008 |
|             | RF        | 0.960±0.004 | 0.559±0.004    | 0.763±0.005 |
|             | SVM       | 0.860±0.006 | 0.634±0.006    | 0.676±0.009 |

**Table 3** Cross-validation performance for models tested using different ML algorithms on the molecular fingerprints (MDFP, Baseline2D, ECFP4, PropertyFP). Performance metrics are represented as average and standard deviation of 10 times 5-fold cross-validation runs of different random seeds.

| fingerprint | ML models | RMSE        | R <sup>2</sup> | MUE         |
|-------------|-----------|-------------|----------------|-------------|
| MDFP        | GBM       | 0.772±0.008 | 0.479±0.008    | 0.582±0.009 |
|             | PLS       | 0.755±0     | 0.494±0        | 0.564±0     |
|             | RF        | 0.819±0.011 | 0.398±0.012    | 0.570±0.006 |
|             | SVM       | 0.802±0.010 | 0.458±0.007    | 0.586±0.005 |
|             | consensus | 0.745±0.005 | 0.495±0.005    | 0.524±0.003 |
| Baseline2D  | GBM       | 0.794±0.005 | 0.472±0.004    | 0.568±0.004 |
|             | PLS       | 0.772±0.000 | 0.441±0.000    | 0.548±0.000 |
|             | RF        | 0.795±0.015 | 0.423±0.015    | 0.545±0.011 |
|             | SVM       | 0.721±0.005 | 0.525±0.005    | 0.520±0.011 |
|             | consensus | 0.713±0.003 | 0.520±0.004    | 0.507±0.002 |
| ECFP4       | GBM       | 0.858±0.008 | 0.348±0.010    | 0.664±0.009 |
|             | PLS       | 0.752±0.001 | 0.495±0.010    | 0.578±0.006 |
|             | RF        | 0.865±0.009 | 0.315±0.011    | 0.635±0.011 |
|             | SVM       | 0.737±0     | 0.491±0        | 0.553±0     |
|             | consensus | 0.761±0.001 | 0.457±0.003    | 0.571±0.003 |
| PropertyFP  | GBM       | 0.813±0.005 | 0.432±0.006    | 0.632±0.008 |
|             | PLS       | 0.764±0.002 | 0.492±0.003    | 0.596±0.001 |
|             | RF        | 0.709±0.006 | 0.529±0.009    | 0.540±0.006 |
|             | SVM       | 0.761±0.035 | 0.488±0.040    | 0.605±0.033 |
|             | consensus | 0.730±0.008 | 0.508±0.010    | 0.560±0.008 |

**Table 4** Cross-validation performance for models trained using different ML algorithms on the molecular fingerprints (MDFP + Baseline2D, MDFP + ECFP4, MDFP + PropertyFP, MDFP++). Performance metrics are represented as average and standard deviation of 10 times 5-fold cross-validation runs of different random seeds.

| fingerprint       | ML models | RMSE        | R <sup>2</sup> | MUE         |
|-------------------|-----------|-------------|----------------|-------------|
| MDFP + Baseline2D | GBM       | 0.991±0.005 | 0.516±0.005    | 0.767±0.005 |
|                   | PLS       | 1.068±0.007 | 0.458±0.004    | 0.820±0.004 |
|                   | RF        | 0.950±0.006 | 0.560±0.006    | 0.738±0.005 |
|                   | SVM       | 0.938±0.008 | 0.568±0.007    | 0.717±0.008 |
| MDFP + ECFP4      | GBM       | 0.975±0.005 | 0.529±0.006    | 0.745±0.006 |
|                   | PLS       | 1.021±0.010 | 0.509±0.005    | 0.797±0.009 |
|                   | RF        | 0.945±0.005 | 0.566±0.004    | 0.740±0.005 |
|                   | SVM       | 0.935±0.005 | 0.569±0.004    | 0.740±0.005 |
| MDFP + PropertyFP | GBM       | 0.915±0.008 | 0.585±0.006    | 0.722±0.009 |
|                   | PLS       | 0.948±0.011 | 0.568±0.009    | 0.754±0.011 |
|                   | RF        | 0.944±0.005 | 0.578±0.004    | 0.742±0.004 |
|                   | SVM       | 0.837±0.006 | 0.654±0.006    | 0.659±0.007 |
| MDFP++            | GBM       | 0.920±0.008 | 0.580±0.006    | 0.723±0.008 |
|                   | PLS       | 0.958±0.007 | 0.556±0.005    | 0.754±0.007 |
|                   | RF        | 0.940±0.005 | 0.578±0.004    | 0.742±0.005 |
|                   | SVM       | 0.873±0.007 | 0.623±0.005    | 0.686±0.007 |

**Table 5** Predictions were generated using different ML models trained on MDFP combined with multi-dimensional molecular fingerprints (MDFP + Baseline2D, MDFP + ECFP4, MDFP + PropertyFP, MDFP++) in test. MDFP++ including MDFP, Baseline2D, ECFP4, and PropertyFP.

| fingerprint       | ML models | RMSE        | R <sup>2</sup> | MUE         |
|-------------------|-----------|-------------|----------------|-------------|
| MDFP + Baseline2D | GBM       | 0.728±0.008 | 0.525±0.008    | 0.544±0.008 |
|                   | PLS       | 0.751±0.007 | 0.502±0.011    | 0.559±0.006 |
|                   | RF        | 0.789±0.009 | 0.427±0.011    | 0.560±0.008 |
|                   | SVM       | 0.781±0.003 | 0.494±0.002    | 0.551±0.001 |
|                   | consensus | 0.721±0.003 | 0.524±0.003    | 0.518±0.003 |
| MDFP + ECFP4      | GBM       | 0.758±0.007 | 0.491±0.007    | 0.569±0.004 |
|                   | PLS       | 0.702±0     | 0.555±0        | 0.535±0     |
|                   | RF        | 0.750±0.012 | 0.472±0.016    | 0.553±0.007 |
|                   | SVM       | 0.698±0.003 | 0.550±0.004    | 0.522±0.008 |
|                   | consensus | 0.694±0.002 | 0.548±0.003    | 0.515±0.004 |
| MDFP + PropertyFP | GBM       | 0.799±0.009 | 0.456±0.010    | 0.615±0.008 |
|                   | PLS       | 0.794±0.000 | 0.481±0.004    | 0.610±0.003 |
|                   | RF        | 0.709±0.008 | 0.527±0.011    | 0.549±0.009 |
|                   | SVM       | 0.723±0.011 | 0.518±0.012    | 0.578±0.012 |
|                   | consensus | 0.719±0.003 | 0.523±0.003    | 0.554±0.003 |
| MDFP++            | GBM       | 0.811±0.008 | 0.448±0.009    | 0.619±0.009 |
|                   | PLS       | 0.702±0     | 0.587±0        | 0.526±0     |
|                   | RF        | 0.718±0.010 | 0.513±0.014    | 0.554±0.006 |
|                   | SVM       | 0.696±0.015 | 0.564±0.011    | 0.516±0.017 |
|                   | consensus | 0.695±0.004 | 0.557±0.004    | 0.518±0.003 |



**Table 6** Correlation coefficient between the features of MDFP and pIC50.

| feature     | kendall | pearson | spearman |
|-------------|---------|---------|----------|
| rgyr mid    | 0.35    | 0.51    | 0.49     |
| sasa mid    | 0.30    | 0.41    | 0.43     |
| kinetic mid | 0.28    | 0.32    | 0.42     |
| LJ-SR mid   | 0.28    | 0.25    | 0.41     |
| rgyr avr    | 0.23    | 0.20    | 0.33     |
| sasa avr    | 0.20    | 0.16    | 0.29     |
| sasa std    | 0.17    | 0.01    | 0.25     |
| hbond avr   | -0.08   | -0.14   | -0.12    |
| hbond std   | -0.09   | -0.09   | -0.13    |
| hbond mid   | -0.12   | -0.19   | -0.17    |
| tenergy mid | -0.28   | -0.42   | -0.41    |

**Table. 7** Performance indicators of several cardiotoxicity prediction models reported in the literature.

| models               | RMSE        | R <sup>2</sup> | MUE         | Reference                  |
|----------------------|-------------|----------------|-------------|----------------------------|
| QSAR-SVM             | 0.79 ± 0.05 | 0.58 ± 0.05    | -           | (Simeon & Jongkon, 2019)   |
| QSAR-DNN             | 0.90 ± 0.06 | 0.49 ± 0.04    | -           |                            |
| MLR-Canvas           | 1.186       | 0.191          | 0.941       | (Subramanian et al., 2016) |
| DNN-DeepChem         | 1.03        | 0.351          | 0.763       |                            |
| PLS-FFD              | 1.07        | 0.48           | -           | (Munawar et al., 2019)     |
| consensus-MDFP       | 0.745±0.045 | 0.495±0.005    | 0.524±0.003 |                            |
| consensus-MDFP+ECFP4 | 0.694±0.002 | 0.548±0.003    | 0.515±0.004 |                            |
